# Supplementary material
Source: PubMed Central journal article supplement (PMC11385886)
Supplement: PBI-19-966-s002.pdf [file PBI-19-966-s002.pdf]

## Supporting tables

**Table S1 Assembly statistics of each chromosome in the pak choi (subsp. *chinensis*) genome.**

| Chromosome | Number of Contigs | Length of Chromosome |
|------------|-------------------|----------------------|
| A01        | 190               | 38,722,542           |
| A02        | 33                | 32,748,408           |
| A03        | 44                | 40,623,029           |
| A04        | 24                | 22,460,690           |
| A05        | 224               | 39,612,767           |
| A06        | 167               | 38,313,918           |
| A07        | 130               | 33,283,850           |
| A08        | 19                | 22,567,373           |
| A09        | 128               | 51,199,229           |
| A10        | 43                | 22,103,602           |
| Total      | 1,002             | 341,635,408          |

**Table S2 Statistics of genome completeness in the three *B. rapa* genome assemblies according to BUSCO.**

|                                 | Pak choi |                | Chinese cabbage (V3) |                | Yellow sarson |                |
|---------------------------------|----------|----------------|----------------------|----------------|---------------|----------------|
|                                 | Proteins | Percentage (%) | Proteins             | Percentage (%) | Proteins      | Percentage (%) |
| Complete BUSCOs                 | 1,412    | 98.1           | 1,410                | 97.9           | 1,407         | 97.7           |
| Complete and single-copy BUSCOs | 1,235    | 85.8           | 1,235                | 85.8           | 1,236         | 85.8           |
| Complete and duplicated BUSCOs  | 177      | 12.3           | 175                  | 12.1           | 171           | 11.9           |
| Fragmented BUSCOs               | 11       | 0.8            | 9                    | 0.6            | 11            | 0.8            |

|                             |       |     |       |     |       |     |
|-----------------------------|-------|-----|-------|-----|-------|-----|
| Missing BUSCOs              | 17    | 1.1 | 21    | 1.5 | 22    | 1.5 |
| Total BUSCO groups searched | 1,440 | 100 | 1,440 | 100 | 1,440 | 100 |

**Table S3 Statistics of repetitive sequences in the pak choi (subsp. *chinensis*) genome.**

| Type     | RepeatMasker TEs |                | RepeatProteinMask TEs |                | De novo     |                | Combined TEs |                |
|----------|------------------|----------------|-----------------------|----------------|-------------|----------------|--------------|----------------|
|          | Length (bp)      | Percentage (%) | Length (bp)           | Percentage (%) | Length (bp) | Percentage (%) | Length (bp)  | Percentage (%) |
| DNA      | 11,995,663       | 3.23           | 1,267,545             | 0.34           | 26,981,764  | 7.27           | 33,442,663   | 9.02           |
| LINE     | 6,210,960        | 1.67           | 7,598,542             | 2.05           | 12,511,472  | 3.37           | 16,031,549   | 4.32           |
| SINE     | 13,412           | 0              | 0                     | 0              | 179,293     | 0.05           | 192,705      | 0.05           |
| LTR      | 32,616,197       | 8.79           | 30,611,069            | 8.25           | 102,291,456 | 27.58          | 108,924,720  | 29.37          |
| Other    | 57,585           | 0.02           | 0                     | 0              | 12,224      | 0              | 69,809       | 0.02           |
| Unknown  | 79,057           | 0.02           | 0                     | 0              | 10,605,485  | 2.86           | 10,677,567   | 2.88           |
| Total TE | 50,667,969       | 13.66          | 39,475,145            | 10.64          | 147,094,599 | 39.66          | 166,904,453  | 45             |

**Table S4 Statistics of centromere information on pak choi chromosomes.**

| Chr | CentBr     |            | CRB        |            | PCRBr      |            | TR238      |            |
|-----|------------|------------|------------|------------|------------|------------|------------|------------|
|     | Start      | End        | Start      | End        | Start      | End        | Start      | End        |
| A01 | 23,267,167 | 24,628,674 | 23,247,268 | 24,639,006 | 15,704,697 | 23,158,859 | 15,571,023 | 23,313,371 |
| A02 | 19,809,316 | 20,033,131 | 20,664,273 | 20,845,739 | 16,898,653 | 19,867,615 | 19,849,670 | 19,909,523 |
| A03 | 33,848,340 | 36,152,144 | 26,079,575 | 35,103,509 | 35,968,421 | 37,245,732 | 35,957,038 | 36,148,406 |
| A04 | 7,051,689  | 7,189,650  | 6,852,283  | 7,184,871  | 6,845,682  | 6,856,527  | 6,989,562  | 7,042,092  |
| A05 | 13,690,592 | 24,796,193 | 14,008,078 | 26,401,734 | 13,222,612 | 23,578,707 | 13,698,021 | 23,561,497 |
| A06 | 15,468,181 | 16,449,691 | 14,100,872 | 16,253,912 | 16,554,850 | 24,796,282 | 16,419,685 | 24,771,229 |
| A07 | 4,894,166  | 11,526,942 | 6,331,973  | 11,577,111 | 6,464,703  | 9,655,267  | 6,441,841  | 9,666,172  |
| A08 | 6,876,134  | 7,709,362  | 6,742,690  | 6,801,008  | 4,070,190  | 5,809,769  | /          | /          |
| A09 | 25,024,368 | 27,656,897 | 25,062,604 | 25,200,299 | 20,847,237 | 26,809,796 | 20,842,115 | 26,816,206 |

**Table S5 Summary of non-coding RNA (ncRNA) genes in the pak choi (subsp. *chinensis*) genome.**

| Type  | Copy     | Average length (bp) | Total length (bp) | Percentage in genome (%) |          |
|-------|----------|---------------------|-------------------|--------------------------|----------|
| miRNA | 255      | 125.4               | 31,977            | 0.008622                 |          |
| tRNA  | 1,599    | 75.1                | 120,140           | 0.032392                 |          |
| rRNA  | rRNA     | 4,495               | 524.2             | 2,356,562                | 0.635369 |
|       | 18S      | 1,164               | 1340.1            | 1,559,873                | 0.420568 |
|       | 28S      | 1,369               | 197.4             | 270,190                  | 0.072848 |
|       | 5.8S     | 857                 | 449.6             | 385,282                  | 0.103879 |
|       | 5S       | 1,105               | 127.8             | 141,217                  | 0.038074 |
|       | 8S       | 0                   | 0                 | 0                        | 0        |
| snRNA | snRNA    | 1,062               | 110.9             | 117,813                  | 0.031764 |
|       | CD-box   | 795                 | 102.4             | 81,369                   | 0.021938 |
|       | HACA-box | 92                  | 122.8             | 11,294                   | 0.003045 |
|       | splicing | 175                 | 143.7             | 25,150                   | 0.006781 |
|       | scaRNA   | 0                   | 0                 | 0                        | 0        |

**Table S6 Statistics of gene annotation completeness in the three *B. rapa* genome assemblies according to BUSCO.**

|                                 | Pak choi |                | Chinese cabbage (V3) |                | Yellow sarson |                |
|---------------------------------|----------|----------------|----------------------|----------------|---------------|----------------|
|                                 | Proteins | Percentage (%) | Proteins             | Percentage (%) | Proteins      | Percentage (%) |
| Complete BUSCOs                 | 1,409    | 97.9           | 1,400                | 97.2           | 1,391         | 96.6           |
| Complete and single-copy BUSCOs | 1,202    | 83.5           | 1,213                | 84.2           | 1,204         | 83.6           |

|                                |       |      |       |     |       |     |
|--------------------------------|-------|------|-------|-----|-------|-----|
| Complete and duplicated BUSCOs | 207   | 14.4 | 187   | 13  | 187   | 13  |
| Fragmented BUSCOs              | 10    | 0.7  | 18    | 1.2 | 13    | 0.9 |
| Missing BUSCOs                 | 21    | 1.4  | 22    | 1.6 | 36    | 2.5 |
| Total BUSCO groups searched    | 1,440 | 100  | 1,440 | 100 | 1,440 | 100 |

**Table S7 Pak choi genes with large-effect mutations compared with the Chinese cabbage and yellow sarson genomes.**

This table is provided as Microsoft Excel spreadsheet.

**Table S8 Pak choi genes with large structure variations compared with the Chinese cabbage and yellow sarson genomes.**

This table is provided as Microsoft Excel spreadsheet.

**Table S9 Summary of PAV genes in the Chinese cabbage, yellow sarson and pak choi genomes.**

This table is provided as Microsoft Excel spreadsheet.

**Table S10 SV and PAV genes related to flowering in the pak choi and yellow sarson genomes.**

| Genes           | <i>B. rapa</i> gene ID | Arabidopsis ID   | Annotation                          | Variation Type                                    |
|-----------------|------------------------|------------------|-------------------------------------|---------------------------------------------------|
| <i>BrAP1A</i>   | <i>BraA02g01908P</i>   | <i>AT1G69120</i> | Floral homeotic protein APETALA 1 A | SV: Premature stop codon                          |
| <i>BrBBX19</i>  | <i>BraA01t01996Z</i>   | <i>AT4G38960</i> | B-box zinc finger protein 19        | PAV: PC absent                                    |
| <i>BrBOFH</i>   | <i>BraA06g02518P</i>   | <i>AT5G61850</i> | Transcription factor BOFH           | PAV: YS absent                                    |
| <i>BrCSTF77</i> | <i>BraA08g02799P</i>   | <i>AT1G17760</i> | Cleavage stimulation factor 77      | PAV: PC absent                                    |
| <i>BrEMF1</i>   | <i>BraA03g00457P</i>   | <i>AT5G11530</i> | EMBRYONIC FLOWER 1                  | SV: Premature stop codon, with 3n+-1 indel in CDS |

|               |                      |                  |                                                  |                                                                                   |
|---------------|----------------------|------------------|--------------------------------------------------|-----------------------------------------------------------------------------------|
| <i>BrEMF2</i> | <i>BraA02g01601P</i> | <i>AT5G51230</i> | EMBRYONIC FLOWER 2                               | SV: Premature stop codon,<br>Splice acceptor mutation,<br>with 3n+-1 indel in CDS |
| <i>BrFLC2</i> | <i>BraA02g00340P</i> | <i>AT5G10140</i> | FLOWERING LOCUS C                                | SV: Premature stop codon                                                          |
| <i>BrFPA1</i> | <i>BraA09g03655P</i> | <i>AT1G27750</i> | Flowering time control protein FPA               | SV: Premature stop codon                                                          |
| <i>BrFPA2</i> | <i>BraA09g04862P</i> | <i>AT2G43410</i> | Flowering time control protein FPA               | SV: with 3n+-1 indel in<br>CDS                                                    |
| <i>BrFRI</i>  | <i>BraA10g00883P</i> | <i>AT4G00650</i> | Protein FRIGIDA                                  | PAV: YS absent                                                                    |
| <i>BrGAI</i>  | <i>BraA03g02755P</i> | <i>AT4G02780</i> | Ent-copalyl diphosphate synthase                 | SV: Premature stop codon                                                          |
| <i>BrLFR</i>  | <i>BraA05g02429P</i> | <i>AT3G22990</i> | LEAF AND FLOWER RELATED                          | SV: Premature stop codon                                                          |
| <i>BrLHY</i>  | <i>BraA10g00082P</i> | <i>AT1G01060</i> | Protein LHY                                      | SV: Premature stop codon                                                          |
| <i>BrMAF4</i> | <i>BraA06g02829P</i> | <i>AT5G65070</i> | MADS AFFECTING<br>FLOWERING 4                    | PAV: PC absent                                                                    |
| <i>BrPHYA</i> | <i>BraA09g06044P</i> | <i>AT1G09570</i> | Phytochrome A                                    | SV: Premature stop codon,<br>with 3n+-1 indel in CDS                              |
| <i>BrRGA1</i> | <i>BraA07g01654P</i> | <i>AT2G01570</i> | DELLA protein RGA1                               | PAV: YS absent                                                                    |
| <i>BrSVP</i>  | <i>BraA04g01624P</i> | <i>AT2G22540</i> | MADS-box protein SVP                             | SV: Premature stop codon                                                          |
| <i>BrTOE2</i> | <i>BraA02g01041P</i> | <i>AT5G60120</i> | Ethylene-responsive transcription<br>factor TOE2 | SV: Premature stop codon,<br>with 3n+-1 indel in CDS                              |

**Table S11 Primers used for qRT-PCR assays.**

| Gene          | Forward Primer         | Reverse Primer           | Fragment<br>size |
|---------------|------------------------|--------------------------|------------------|
| <i>GAPDH</i>  | CAGGTTTGGAAATTGTCGAGG  | GAGCTGTGGAAGCACCTTTC     | 175 bp           |
| <i>BrMAF4</i> | TGTTCTCATCGTTTCCTCTACC | GCATGTTGTACTIONCGTAATGCT | 93 bp            |
