# Supplementary material
Source: PubMed Central journal article supplement (PMC11385886)
Supplement: PBI-19-966-s003.pdf [file PBI-19-966-s003.pdf]

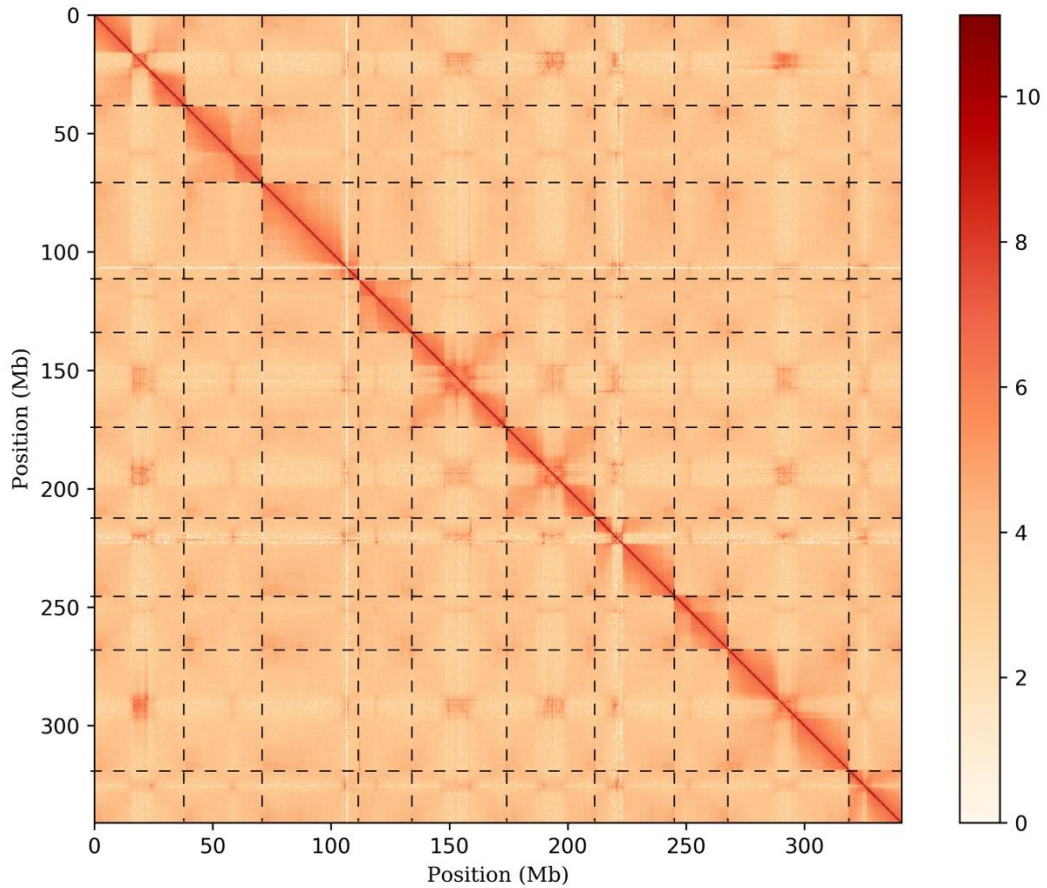

**Figure S1 Hi-C interaction heatmap of the pak choi genome.** The color bar represents the logarithm of contact density from high (red) to low (white). Note that only sequences anchored on chromosomes are shown in the plot.

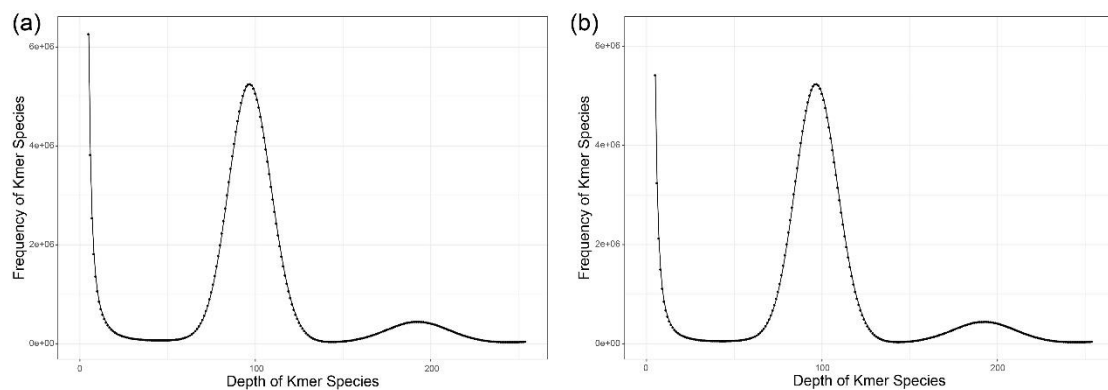

**Figure S2 KmerFreq-AR analysis of pak choi genome size.** (a) Distribution of Kmer frequencies using all pak choi reads data. (b) Distribution of Kmer frequencies without the organelle reads data. K-mers values were plotted against the frequency. The overall genome size and size without the organelle data were about 463 and 406

Mb, respectively.

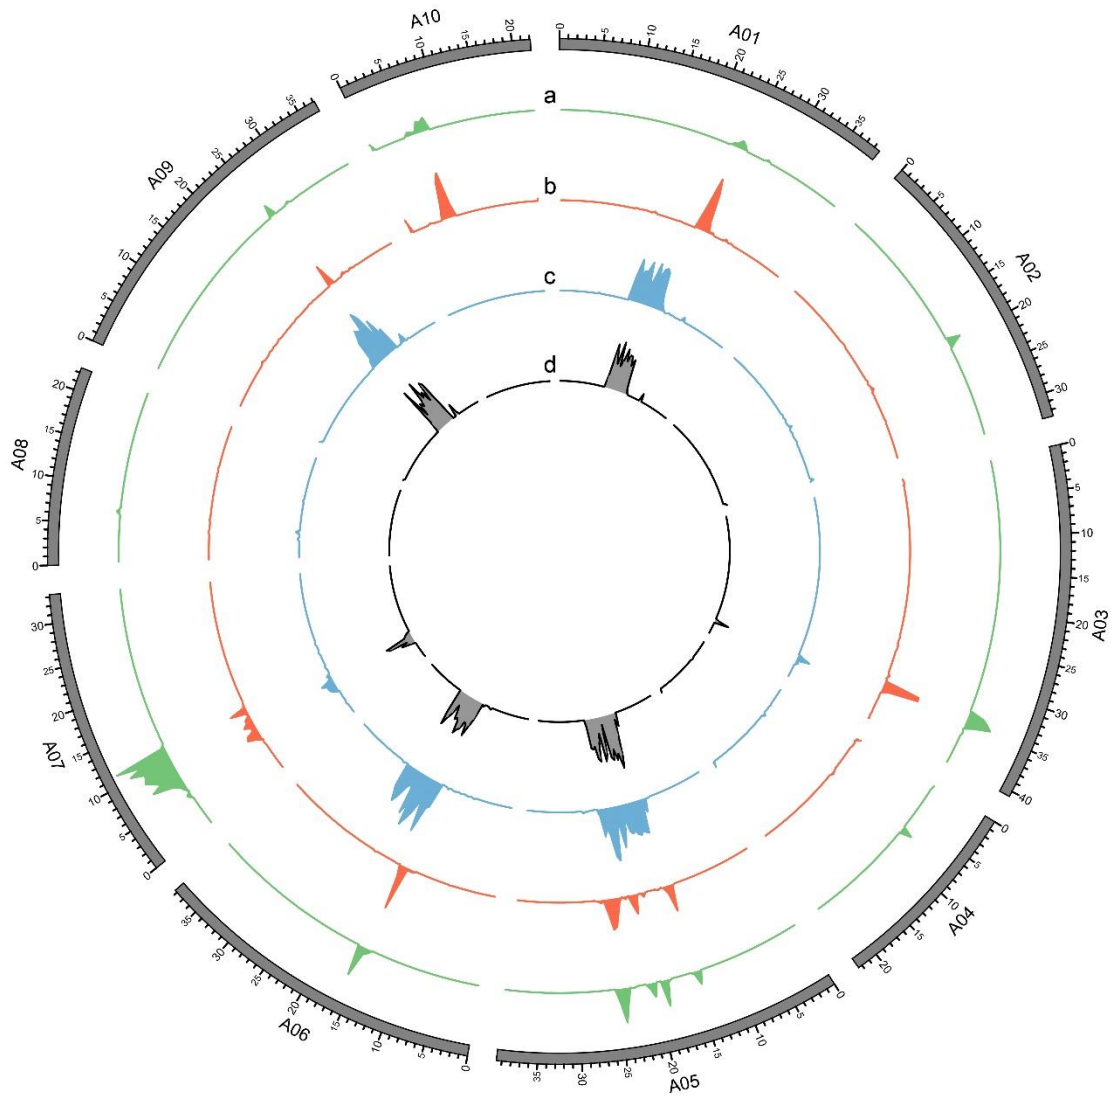

**Figure S3 Distribution of centromeric repeats in pak choi genome.** Tracks (a) CentBr repeats, (b) CRB repeats, (c) PCRBr repeats, (d) TR238 repeats.

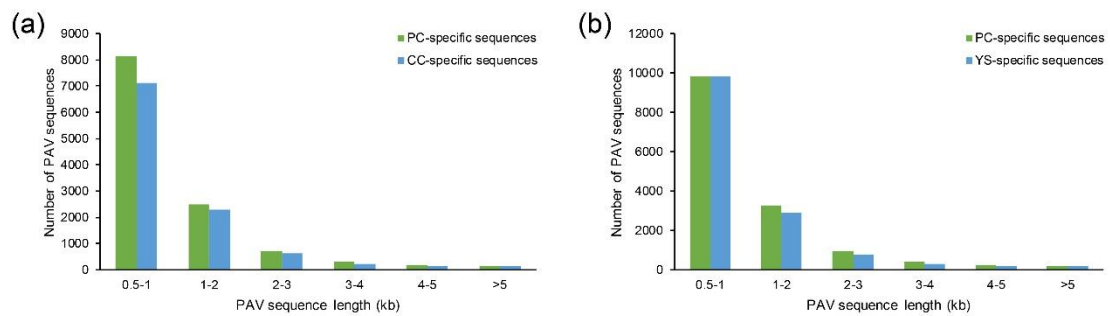

**Figure S4 Length distribution of PAV sequences in the Chinese cabbage, yellow**

**sarson and pak choi genomes.** (a) Length distribution of PAV sequences between Chinese cabbage and pak choi genomes. (b) Length distribution of PAV sequences between yellow sarson and pak choi genomes.

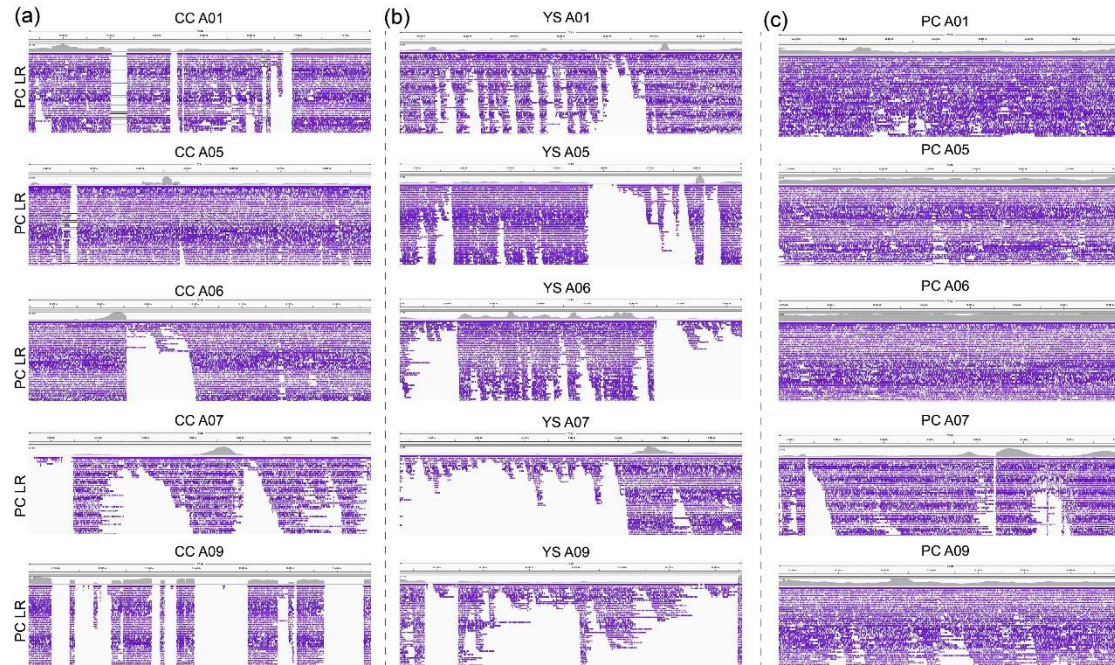

**Figure S5 The IGV alignments of centromeric regions using pak choi long reads.** The PacBio data of pak choi was mapped to Chinese cabbage (a), yellow sarson (b) and pak choi (c) genomes, respectively.

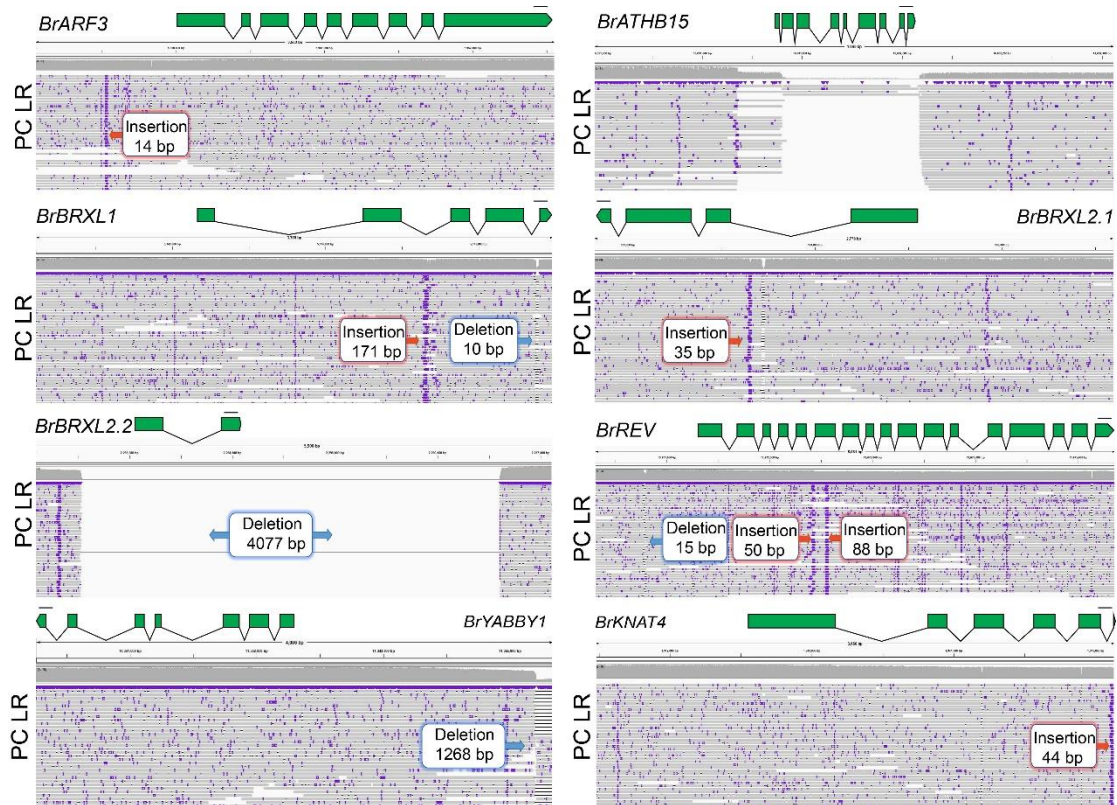

**Figure S6 Identification of structural variants of the eight remaining heading genes.**

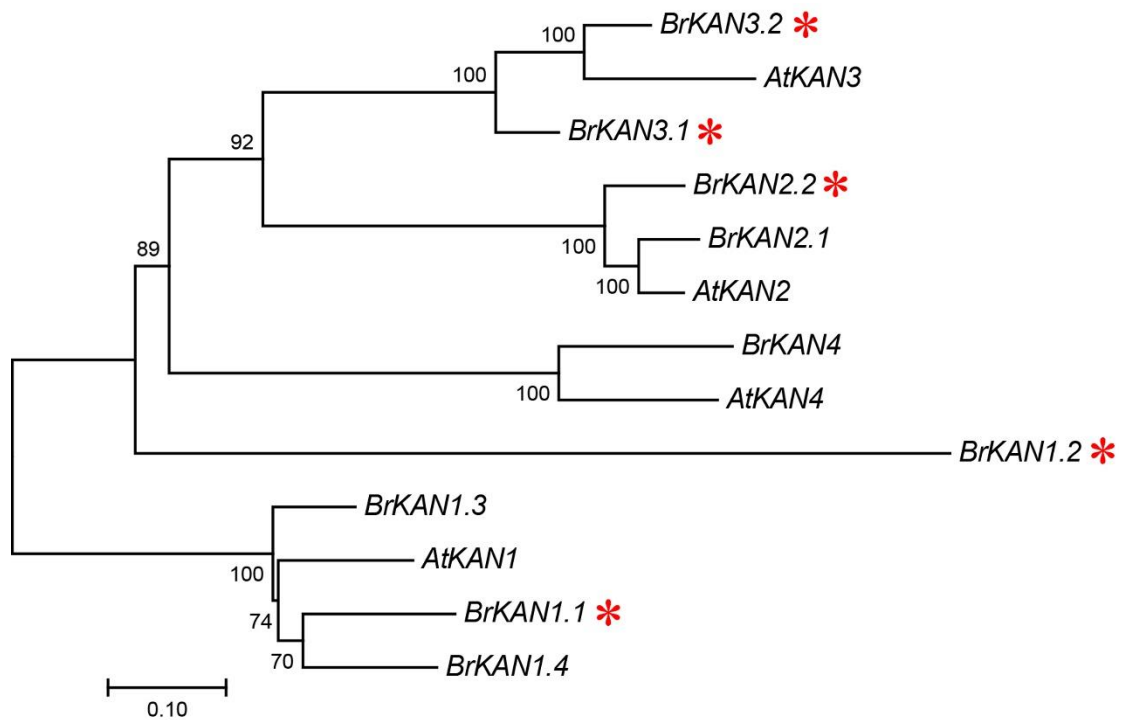

**Figure S7 Phylogenies of the *KAN* genes from *A. thaliana* and *B. rapa***

**annotations.** The annotated genes from *A. thaliana* and *B. rapa* are prefixed with *At* and *Br* respectively. Red star indicates the variant *KAN* genes between pak choi and Chinese cabbage.

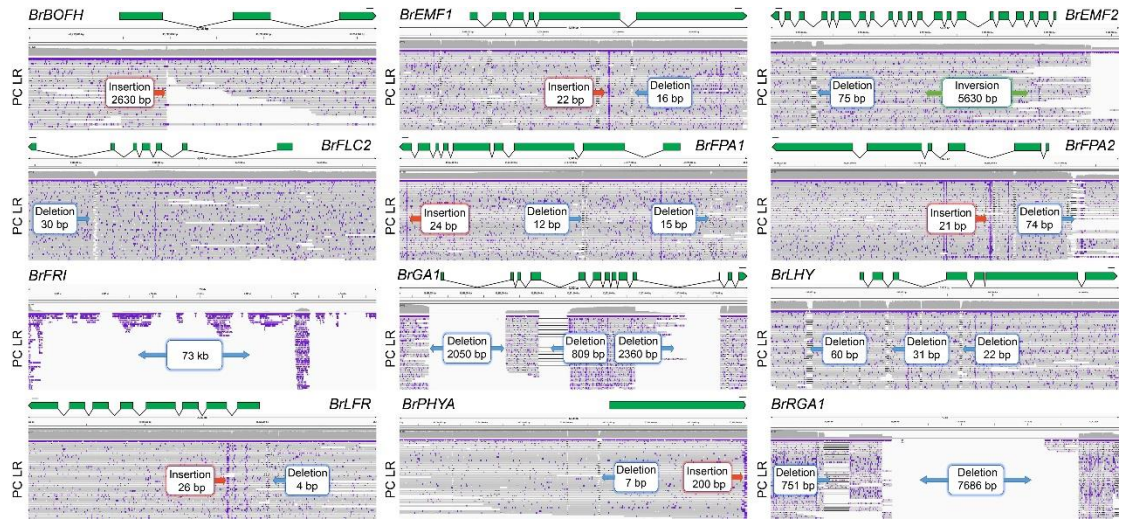

**Figure S8 Identification of structural variants of the 12 remaining flowering genes.**

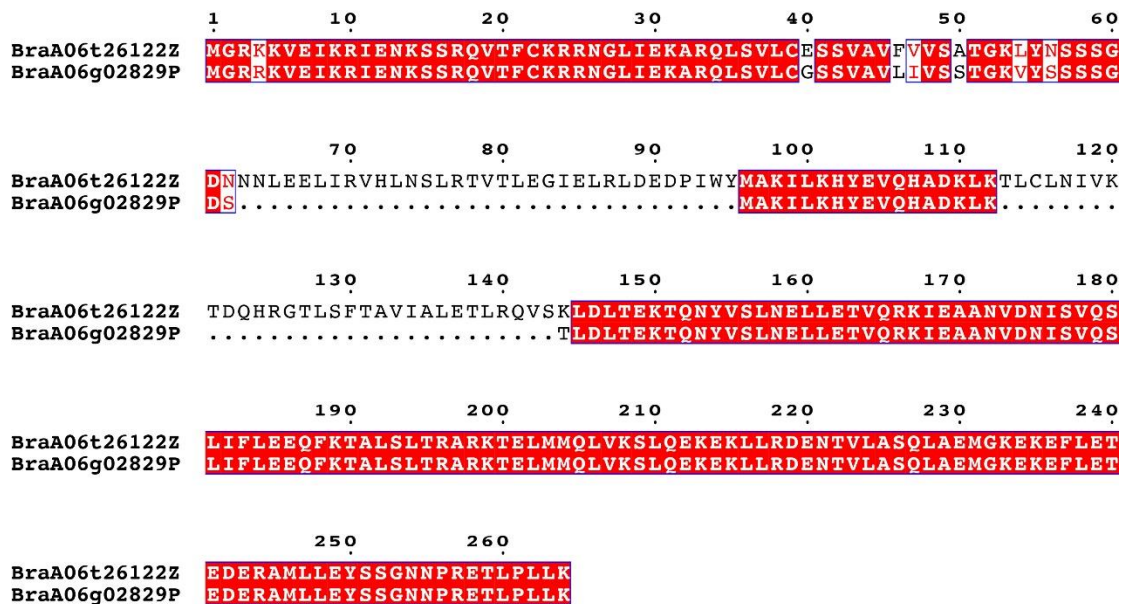

**Figure S9 Alignment of BrMAF4-annotated protein sequences between the pak choi and yellow sarson genomes.**

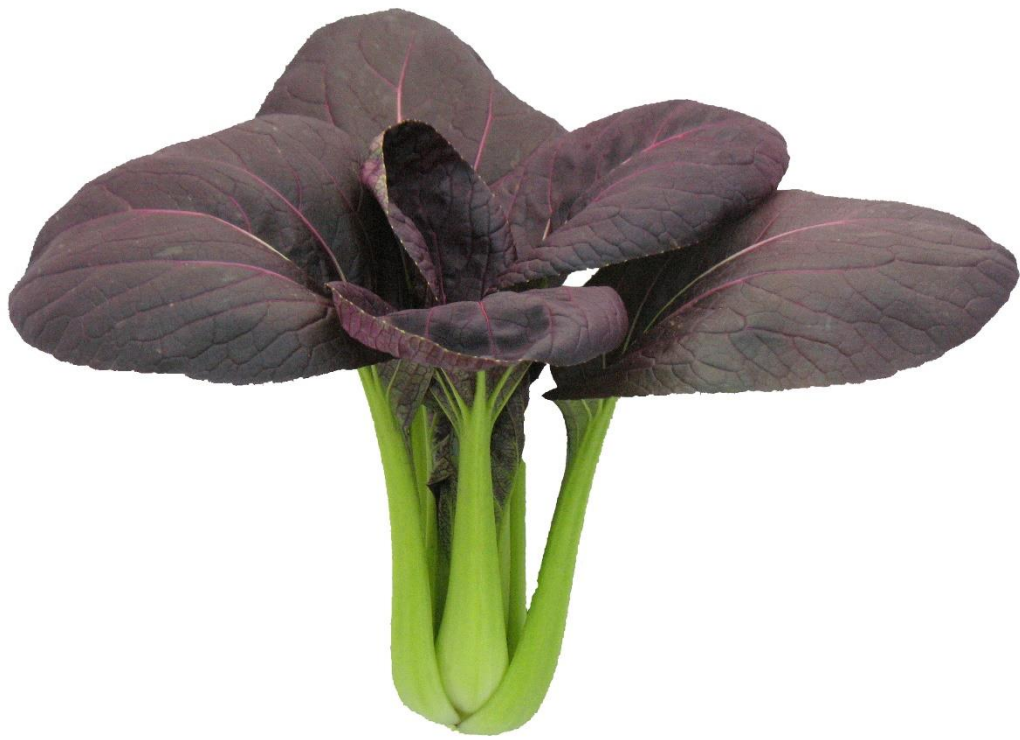

**Figure S10 The pak choi phenotype (ZYCX).**
